# Supplementary material for: Assessing the Quality and Impact of eHealth Tools: Systematic Literature Review and Narrative Synthesis
Source: PubMed Central journal article supplement (PMC10131913; doi:10.2196/45143), 2023-03-23
Supplement: humanfactors_v10i1e45143_app3.pdf [file humanfactors_v10i1e45143_app3.pdf]

## Appendix 3:

### Phases of thematic analysis after Braun & Clarke

---

|                                                                      |                                                                                                                                                                                                                                                  |
|----------------------------------------------------------------------|--------------------------------------------------------------------------------------------------------------------------------------------------------------------------------------------------------------------------------------------------|
| <b>Familiarizing yourself with your data</b>                         | Transcribing data, reading and re-reading the data, noting down initial ideas.                                                                                                                                                                   |
| <b>Generating initial codes</b>                                      | Coding interesting features of the data in a systematic fashion across the entire data set, collating data relevant to each code.                                                                                                                |
| <b>Searching for themes</b>                                          | Collating codes into potential themes, gathering all data relevant to each potential theme.                                                                                                                                                      |
| <b>Reviewing themes</b>                                              | Checking if the themes work in relation to the coded extracts (Level 1) and the entire data set (Level 2), generating a thematic 'map' of the analysis.                                                                                          |
| <b>Defining and naming themes</b>                                    | On-going analysis to refine the specifics of each theme, and the overall story the analysis tells, generating clear definitions and names for each theme.                                                                                        |
| <b>Linking themes to explanatory frameworks, models and concepts</b> | Making a contribution to theory, reflecting on the validity of different sociomaterial approaches. Building new approaches and theoretical categories and concepts.                                                                              |
| <b>Producing the report</b>                                          | The final opportunity for analysis. Selection of a vivid, compelling extract examples, final analysis of selected extracts, relating back of the analysis to the research question and literature, producing a scholarly report of the analysis. |

---

Source:

Braun and Clarke [31-33]
