# Supplementary material for: Assessing the Quality and Impact of eHealth Tools: Systematic Literature Review and Narrative Synthesis
Source: PubMed Central journal article supplement (PMC10131913; doi:10.2196/45143), 2023-03-23
Supplement: humanfactors_v10i1e45143_app4.pdf [file humanfactors_v10i1e45143_app4.pdf]

#### Appendix 4. Characteristics of included studies.

| Study characteristic (n)           | References                                           |
|------------------------------------|------------------------------------------------------|
| <b>Study design</b>                |                                                      |
| Mixed methods (12)                 | [15,16,20,32,42,47,52,56–58,61,62]                   |
| Quantitative (7)                   | [17,21,36,43,45,51,55]                               |
| Qualitative (6)                    | [18,38,46,48,53,54]                                  |
| Randomized control trial (RCT) (2) | [35,49]                                              |
| Systematic review (13)             | [19,30,31,33,34,37,39–41,44,50,59,60]                |
| <b>Disease area or focus</b>       |                                                      |
| Mental health (3)                  | [20,21,55]                                           |
| Health behavior change (3)         | [40,48,49]                                           |
| Pediatrics (2)                     | [35,53]                                              |
| Adolescents (1)                    | [44]                                                 |
| Asthma (1)                         | [42]                                                 |
| Diabetes (1)                       | [52]                                                 |
| Hypertension (1)                   | [36]                                                 |
| Medication adherence (1)           | [16]                                                 |
| Noncommunicable diseases (1)       | [60]                                                 |
| Obesity (1)                        | [62]                                                 |
| Oncology (1)                       | [17]                                                 |
| Opioid use (1)                     | [57]                                                 |
| Physical activity (1)              | [34]                                                 |
| Self-tracking (1)                  | [43]                                                 |
| Telemonitoring (1)                 | [30]                                                 |
| Non-specific (20)                  | [15,18,19,31–33,37–39,41,45–47,50,51,54,56,58,59,61] |
| <b>Location</b>                    |                                                      |
| The United States (5)              | [15,18,32,35,36]                                     |
| Sweden (2)                         | [38,49]                                              |
| The United Kingdom (2)             | [48,56]                                              |
| Australia (1)                      | [21]                                                 |
| Canada (1)                         | [20]                                                 |
| Estonia (1)                        | [52]                                                 |
| Iran (1)                           | [51]                                                 |
| Korea (1)                          | [46]                                                 |
| Portugal (1)                       | [30]                                                 |
| Singapore (1)                      | [16]                                                 |

|  |                   |                                                   |
|--|-------------------|---------------------------------------------------|
|  | Spain (1)         | [62]                                              |
|  | Non-specific (22) | [17,19,31,33,34,37,39-41,43-45,47,50,53-55,57-61] |
